# Supplementary material for: Association between PTEN and clinical-pathological features of osteosarcoma
Source: PubMed Central journal article supplement (PMC6639452; doi:10.1042/bsr20190954), 2019-07-19
Supplement: bsr20190954_Supp1.pdf [file bsr20190954_Supp1.pdf]

**Supplementary table 1. Qualitative assessment of included study.**

| Column        | Entries                                                                     | Study |    |   |   |    |   |    |    |
|---------------|-----------------------------------------------------------------------------|-------|----|---|---|----|---|----|----|
|               |                                                                             | 1     | 2  | 3 | 4 | 5  | 6 | 7  | 8  |
| Section       | Is the definition adequate                                                  | ☆     | ☆  | ☆ | ☆ | ☆  | ☆ | ☆  | ☆  |
|               | Representativeness of the cases                                             | ☆     | ☆  | ☆ | ☆ | ☆  | ☆ | ☆  | ☆  |
|               | Selection of controls                                                       |       |    |   |   |    |   |    |    |
|               | Definition of controls                                                      | ☆     | ☆  | ☆ | ☆ | ☆  | ☆ | ☆  | ☆  |
| Comparability | Comparability of cases and controls on the basis of the design and analysis | ☆     | ☆☆ | ☆ | ☆ | ☆☆ | ☆ | ☆☆ | ☆☆ |
|               | Ascertainment of exposure                                                   | ☆     | ☆  | ☆ | ☆ | ☆  | ☆ | ☆  | ☆  |
| Exposure      | Same method of ascertainment for cases and controls                         | ☆     | ☆  | ☆ | ☆ | ☆  | ☆ | ☆  | ☆  |
|               | Non-Response rate                                                           | ☆     | ☆  | ☆ | ☆ | ☆  | ☆ | ☆  | ☆  |
| Total scores  |                                                                             | 7     | 8  | 7 | 7 | 8  | 7 | 8  | 8  |

Notes: 1. Gong et al. 2017, 2. Su et al. 2009, 3. Zheng et al. 2009, 4. Han et al. 2009, 5. Lei et al. 2009, 6. Gu et al. 2008, 7. Xie et al. 2007, 8. Duan et al. 2007.

| Column        | Entries                                                                           | Study |    |    |    |    |
|---------------|-----------------------------------------------------------------------------------|-------|----|----|----|----|
|               |                                                                                   | 9     | 10 | 11 | 12 | 13 |
| Section       | Is the definition adequate                                                        | ☆     | ☆  | ☆  | ☆  | ☆  |
|               | Representativeness of the cases                                                   | ☆     | ☆  | ☆  | ☆  | ☆  |
|               | Selection of controls                                                             |       |    |    |    |    |
|               | Definition of controls                                                            | ☆     | ☆  | ☆  | ☆  | ☆  |
| Comparability | Comparability of cases and controls<br>on the basis of the design and<br>analysis | ☆     | ☆  | ☆☆ | ☆☆ | ☆  |
|               | Ascertainment of exposure                                                         | ☆     | ☆  | ☆  | ☆  | ☆  |
| Exposure      | Same method of ascertainment for<br>cases and controls                            | ☆     | ☆  | ☆  | ☆  | ☆  |
|               | Non-Response rate                                                                 | ☆     | ☆  | ☆  | ☆  | ☆  |
| Total scores  |                                                                                   | 7     | 7  | 8  | 8  | 7  |

Notes: 9. Chen et al. 2006, 10. Zhong et al. 2006, 11. Liu et al. 2006, 12. Song et al. 2005, 13. Huang et al. 2005.
